# Supplementary material
Source: bioRxiv or medRxiv preprint supplement (https://medrxiv.org/highwire/filestream/82641/field_highwire_adjunct_files/0/2020.05.24.20111823-1.pdf)
Supplement: Supplementary file [file 2020.05.24.20111823-1.pdf]

## Supplementary

**Supplementary Table 1.** ICD-10- and ATC-codes used to define drug and comorbidity.

|                                     | Coding system  | Codes                                                                                                                                                                                                                                                              |
|-------------------------------------|----------------|--------------------------------------------------------------------------------------------------------------------------------------------------------------------------------------------------------------------------------------------------------------------|
| <i>Current drug use<sup>1</sup></i> |                |                                                                                                                                                                                                                                                                    |
| Antihypertensive drugs              | ATC            | C03A C07 C08 C09                                                                                                                                                                                                                                                   |
| ACE/ARBs                            | ATC            | C09                                                                                                                                                                                                                                                                |
| Calcium channel blockers            | ATC            | C08                                                                                                                                                                                                                                                                |
| Beta-blockers                       | ATC            | C07                                                                                                                                                                                                                                                                |
| Thiazides                           | ATC            | C03A                                                                                                                                                                                                                                                               |
| Loop-diuretics                      | ATC            | C03C                                                                                                                                                                                                                                                               |
| Glucose-lowering drugs              | ATC            | A10A A10B                                                                                                                                                                                                                                                          |
| Non-insulin glucose lowering drugs  | ATC            | A10B                                                                                                                                                                                                                                                               |
| Insulin                             | ATC            | A10A                                                                                                                                                                                                                                                               |
| Insulin monotherapy                 | ATC            | A10A, not A10B                                                                                                                                                                                                                                                     |
| Antiplatelets                       | ATC            | B01AC                                                                                                                                                                                                                                                              |
| Anticoagulant therapy               | ATC            | B01AA, B01AE07, B01AF                                                                                                                                                                                                                                              |
| Opioids                             | ATC            | N02A                                                                                                                                                                                                                                                               |
| Benzodiazepines and derivates       | ATC            | N05BA N05CD-F                                                                                                                                                                                                                                                      |
| Antipsychotics                      | ATC            | N05AA N05AB N05AC N05AD N05AE<br>N05AF N05AG N05AH N05AX N05AL01<br>N05AL05                                                                                                                                                                                        |
| Antidepressants                     | ATC            | N06A                                                                                                                                                                                                                                                               |
| Systemic glucocorticoids            | ATC            | H02AB                                                                                                                                                                                                                                                              |
| Inhaled corticosteroids             | ATC            | R03AK R03AL R03BA                                                                                                                                                                                                                                                  |
| Lipid modifying agents              | ATC            | C10                                                                                                                                                                                                                                                                |
| NSAIDs                              | ATC            | M01A (excluding M01AX)                                                                                                                                                                                                                                             |
| Methotrexate                        | ATC            | L04AX03                                                                                                                                                                                                                                                            |
| Biologics                           | SKS<br><br>ATC | BOHJ16A BOHJ18A1-5 BOHJ18B1-8<br>BOHJ18C1 BOHJ19H4 BOHJ19H6 BOHJ26<br>BWHB84<br>L04AA21 L04AA23-6 L04AA28 L04AA33<br>L04AA34 L04AA36 L04AB01 L04AB02<br>L04AB04 L04AB05 L04AC02 L04AC03<br>L04AC05 L04AC07 L04AC08 L04AC10-4<br>L04AC16 L04AC17<br>D11AH05 L01XC02 |
| <i>Medical history<sup>2</sup></i>  |                |                                                                                                                                                                                                                                                                    |
| Chronic lung disease                | ICD-10<br>ATC  | J41-J47<br>R03AK, R03AL, R03BA, R03AC12, R03AC13,<br>R03AC18, R03AC19, R03CC12, R03BB04,<br>R03BB05, R03BB06, R03BB07                                                                                                                                              |
| Hypertension                        | ICD-10         | I10 I11 I12 I13 I15                                                                                                                                                                                                                                                |

|                                                                                         |               |                                                                                  |
|-----------------------------------------------------------------------------------------|---------------|----------------------------------------------------------------------------------|
|                                                                                         | ATC           | C08, C03A, C07, C09                                                              |
| Ischemic heart disease                                                                  | ICD-10<br>ATC | I20 I21 I22 I23 I24 I25<br>N02BA C01DA B01AC24                                   |
| Heart failure                                                                           | ICD-10        | I099A I110 I130 I132 I50                                                         |
| Atrial fibrillation                                                                     | ICD-10        | I48                                                                              |
| Stroke                                                                                  | ICD-10        | I60 I61 I62 I63 I64 I69                                                          |
| Diabetes                                                                                | ICD-10<br>ATC | E10 E11 E13 E14<br>A10                                                           |
| Dementia                                                                                | ICD-10<br>ATC | F00 F01 F02 F03 F1073 F1173 F1273 F1373<br>F1473 F1573 F1673 F1873 F1973<br>N06D |
| Any cancer                                                                              | ICD-10        | C00-C97, excluding C44                                                           |
| Chronic liver disease                                                                   | ICD-10        | K700-K704 K709 K71-K74 K760 K766 B150<br>B160 B162 B18 B190 I85                  |
| Hospital-diagnosed kidney disease                                                       | ICD-10        | I12 I13 N00-N05 N07 N08 N11 N14 N18 N19<br>E102 E112 E142                        |
| Alcohol abuse                                                                           | ICD-10<br>ATC | F10 E244 G312 G621 G721 I426 K292 K70<br>K852 K860 Q860 Z502 Z714 Z721<br>N07BB  |
| Substance abuse                                                                         | ICD-10<br>ATC | F11-F19<br>N07BC                                                                 |
| Organ transplantation                                                                   | ICD-10        | Z94                                                                              |
| Overweight and obesity                                                                  | ICD-10<br>ATC | E66<br>A08                                                                       |
| Severe mental illness<br>(schizophrenia, schizoaffective disorder, or bipolar disorder) | ICD-10<br>ATC | F20 F25 F30 F31<br><br>N05AN                                                     |

<sup>1</sup>Current drug use is defined as at least one filled prescription within 6 months prior to the test date. Of note, there is a lag of 15 days on prescription data.

<sup>2</sup>Medical history is based on an ever-recording of hospital discharge diagnoses, with or without combination with drug redemption data.

ACE: angiotensin-converting enzyme inhibitor; ARB: angiotensin receptor blocker; NSAID: non-steroidal anti-inflammatory drugs.

**Supplementary Table 2.** Baseline characteristics for SARS-CoV-2 PCR positive cases with a fatal course within 30 days, stratified by whether cases were managed in the community or hospitalized prior to their death.

| Characteristic                                            | SARS-CoV-2 PCR positive cases with fatal course |                                        |                             |                                     |                             |
|-----------------------------------------------------------|-------------------------------------------------|----------------------------------------|-----------------------------|-------------------------------------|-----------------------------|
|                                                           | All<br>N=524 (100%)                             | Community-<br>managed**<br>N=115 (22%) | Hospitalized<br>N=409 (78%) | Non-ICU<br>admission<br>N=330 (63%) | ICU admission<br>N=79 (15%) |
| <b>Age years, median (IQR)</b>                            | 82 (75-89)                                      | 87 (79-92)                             | 81 (74-87)                  | 82 (75-88)                          | 73 (68-77)                  |
| 0-29                                                      | 0 (-)***                                        | 0 (-)***                               | 0 (-)***                    | 0 (-)***                            | 0 (-)***                    |
| 30-59                                                     | 15 (2.9%)***                                    | (n<5)***                               | _***                        | _***                                | 6 (7.6%)***                 |
| 60-69                                                     | 51 (9.7%)                                       | 6 (5.2%)                               | 45 (11%)                    | 27 (8.2%)                           | 18 (23%)                    |
| 70-79                                                     | 149 (28%)                                       | 22 (19%)                               | 127 (31%)                   | 86 (26%)                            | 41 (52%)                    |
| 80-89                                                     | 197 (38%)                                       | 42 (37%)                               | 155 (38%)                   | 141 (43%)                           | 14 (18%)                    |
| 90+                                                       | 112 (21%)                                       | 44 (38%)                               | 68 (17%)                    | 68 (21%)                            | 0 (-)                       |
| <b>Sex</b>                                                |                                                 |                                        |                             |                                     |                             |
| Female                                                    | 225 (43%)                                       | 67 (58%)                               | 158 (39%)                   | 146 (44%)                           | 12 (15%)                    |
| Male                                                      | 299 (57%)                                       | 48 (42%)                               | 251 (61%)                   | 184 (56%)                           | 67 (85%)                    |
| <b>Authorized health care workers</b>                     | (n<5)                                           | 0 (-)                                  | (n<5)                       | 0 (-)                               | (n<5)                       |
| Nurse                                                     | 0 (-)                                           | 0 (-)                                  | 0 (-)                       | 0 (-)                               | 0 (-)                       |
| Physician                                                 | (n<5)                                           | 0 (-)                                  | (n<5)                       | 0 (-)                               | (n<5)                       |
| Other                                                     | (n<5)                                           | 0 (-)                                  | (n<5)                       | 0 (-)                               | (n<5)                       |
| <b>Number of comorbidities<sup>1</sup></b>                |                                                 |                                        |                             |                                     |                             |
| Median [IQR]                                              | 3 (2-4)                                         | 3 (2-4)                                | 3 (2-4)                     | 3 (2-5)                             | 3 (1-4)                     |
| 0                                                         | 24 (4.6%)                                       | 8 (7.0%)                               | 16 (3.9%)                   | 11 (3.3%)                           | 5 (6.3%)                    |
| 1                                                         | 75 (14%)                                        | 20 (17%)                               | 55 (13%)                    | 39 (12%)                            | 16 (20%)                    |
| 2                                                         | 103 (20%)                                       | 27 (23%)                               | 76 (19%)                    | 58 (18%)                            | 18 (23%)                    |
| 3                                                         | 114 (22%)                                       | 22 (19%)                               | 92 (22%)                    | 73 (22%)                            | 19 (24%)                    |
| 4+                                                        | 208 (40%)                                       | 38 (33%)                               | 170 (42%)                   | 149 (45%)                           | 21 (27%)                    |
| <b>Hospital contacts within the last year<sup>2</sup></b> |                                                 |                                        |                             |                                     |                             |
| Median [IQR]                                              | 1 (0-2)                                         | 0 (0-1)                                | 1 (0-2)                     | 1 (0-2)                             | 0 (0-1)                     |
| 0                                                         | 252 (48%)                                       | 61 (53%)                               | 191 (47%)                   | 143 (43%)                           | 48 (61%)                    |
| 1                                                         | 136 (26%)                                       | 32 (28%)                               | 104 (25%)                   | 88 (27%)                            | 16 (20%)                    |

|                                     |           |           |           |           |          |
|-------------------------------------|-----------|-----------|-----------|-----------|----------|
| 2                                   | 59 (11%)  | 11 (9.6%) | 48 (12%)  | 40 (12%)  | 8 (10%)  |
| 3                                   | 37 (7.1%) | 7 (6.1%)  | 30 (7.3%) | -         | (n<5)    |
| 4+                                  | 40 (7.6%) | (n<5)     | -         | -         | 5 (6.3%) |
| <b>Current drug use<sup>3</sup></b> |           |           |           |           |          |
| Antihypertensive drugs              | 317 (60%) | 53 (46%)  | 264 (65%) | 216 (65%) | 48 (61%) |
| ACE/ARBs                            | 187 (36%) | 26 (23%)  | 161 (39%) | 128 (39%) | 33 (42%) |
| Calcium channel blockers            | 94 (18%)  | 10 (8.7%) | 84 (21%)  | 70 (21%)  | 14 (18%) |
| Beta-blockers                       | 166 (32%) | 26 (23%)  | 140 (34%) | 116 (35%) | 24 (30%) |
| Thiazides                           | 49 (9.4%) | 12 (10%)  | 37 (9.0%) | 29 (8.8%) | 8 (10%)  |
| Loop-diuretics                      | 174 (33%) | 35 (30%)  | 139 (34%) | 121 (37%) | 18 (23%) |
| Glucose-lowering drugs              | 101 (19%) | 13 (11%)  | 88 (22%)  | 69 (21%)  | 19 (24%) |
| Non-insulin glucose lowering drugs  | 82 (16%)  | 8 (7.0%)  | 74 (18%)  | 57 (17%)  | 17 (22%) |
| Insulin                             | 55 (10%)  | 8 (7.0%)  | 47 (11%)  | 40 (12%)  | 7 (8.9%) |
| Insulin monotherapy                 | 19 (3.6%) | 5 (4.3%)  | 14 (3.4%) | -         | (n<5)    |
| Antiplatelets                       | 180 (34%) | 31 (27%)  | 149 (36%) | 120 (36%) | 29 (37%) |
| Anticoagulant therapy               | 147 (28%) | 31 (27%)  | 116 (28%) | 101 (31%) | 15 (19%) |
| Opioids                             | 187 (36%) | 51 (44%)  | 136 (33%) | 120 (36%) | 16 (20%) |
| Benzodiazepines and derivates       | 103 (20%) | 27 (23%)  | 76 (19%)  | 68 (21%)  | 8 (10%)  |
| Antipsychotics                      | 63 (12%)  | 22 (19%)  | 41 (10%)  | -         | (n<5)    |
| Antidepressants                     | 155 (30%) | 49 (43%)  | 106 (26%) | 93 (28%)  | 13 (16%) |
| Systemic glucocorticoids            | 71 (14%)  | 15 (13%)  | 56 (14%)  | 50 (15%)  | 6 (7.6%) |
| Inhaled corticosteroids             | 83 (16%)  | 13 (11%)  | 70 (17%)  | 60 (18%)  | 10 (13%) |
| Leukotriene receptor antagonist     | (n<5)     | (n<5)     | (n<5)     | (n<5)     | (n<5)    |
| Lipid modifying agents              | 174 (33%) | 25 (22%)  | 149 (36%) | 115 (35%) | 34 (43%) |
| NSAID                               | 50 (9.5%) | (n<5)     | -         | -         | 16 (20%) |
| Methotrexate                        | 5 (1.0%)  | 0 (-)     | 5 (1.2%)  | (n<5)     | (n<5)    |
| Biologics                           | (n<5)     | 0 (-)     | (n<5)     | (n<5)     | 0 (-)    |
| <b>Medical history<sup>4</sup></b>  |           |           |           |           |          |
| Chronic lung diseases*              | 143 (27%) | 22 (19%)  | 121 (30%) | 99 (30%)  | 22 (28%) |
| Hypertension*                       | 378 (72%) | 75 (65%)  | 303 (74%) | 253 (77%) | 50 (63%) |
| Ischemic heart disease*             | 157 (30%) | 33 (29%)  | 124 (30%) | 101 (31%) | 23 (29%) |
| Heart failure                       | 98 (19%)  | 18 (16%)  | 80 (20%)  | 73 (22%)  | 7 (8.9%) |

|                                                |           |          |           |           |          |
|------------------------------------------------|-----------|----------|-----------|-----------|----------|
| Atrial fibrillation                            | 157 (30%) | 38 (33%) | 119 (29%) | 107 (32%) | 12 (15%) |
| Stroke                                         | 126 (24%) | 31 (27%) | 95 (23%)  | 87 (26%)  | 8 (10%)  |
| Diabetes*                                      | 134 (26%) | 21 (18%) | 113 (28%) | 90 (27%)  | 23 (29%) |
| Dementia*                                      | 112 (21%) | 41 (36%) | 71 (17%)  | 71 (22%)  | 0 (-)    |
| Any cancer                                     | 128 (24%) | 22 (19%) | 106 (26%) | 87 (26%)  | 19 (24%) |
| Chronic liver disease                          | 14 (2.7%) | 0 (-)    | 14 (3.4%) | -         | (n<5)    |
| Hospital-diagnosed kidney disease              | 74 (14%)  | 9 (7.8%) | 65 (16%)  | 56 (17%)  | 9 (11%)  |
| Alcohol abuse*                                 | 33 (6.3%) | (n<5)    | -         | -         | 6 (7.6%) |
| Substance abuse*                               | 19 (3.6%) | (n<5)    | -         | -         | (n<5)    |
| Major psychiatric disorder                     | 12 (2.3%) | (n<5)    | -         | -         | (n<5)    |
| Organ transplantation                          | 6 (1.1%)  | 0 (-)    | 6 (1.5%)  | (n<5)     | (n<5)    |
| Overweight and obesity*                        | 53 (10%)  | 7 (6.1%) | 46 (11%)  | 36 (11%)  | 10 (13%) |
| Rheumatoid arthritis/connective tissue disease | 48 (9.2%) | 9 (7.8%) | 39 (9.5%) | 32 (9.7%) | 7 (8.9%) |

<sup>1</sup>Number of comorbidities is the total number of coexisting conditions listed under 'Medical history'.

<sup>2</sup>Hospital admissions of more than 12 hours, from 365 days to 14 days prior to the index date.

<sup>3</sup>Current drug use is defined as at least one filled prescription within 6 months prior to the test date. Of note, there is a lag of 15 days on prescription data.

<sup>4</sup>Medical history is based on an ever-recording of hospital discharge diagnoses. Comorbidities marked by \* are defined by hospital discharge diagnoses in combination with drug use for the comorbidity (i.e. filled prescription within 6 months prior to the test date). For details on definitions, see **Supplementary Table 1**.

\*\* These patients died without having a recorded hospital admission (defined as hospitalizations lasting 12 hours or more) within 14 days of the index date. Of note, 15 of these patients were recorded as being admitted to hospital at time of death (mainly due to death occurring very shortly after admission).

\*\*\*Age categories (0-29, 30-59) collapsed to ensure anonymity.

IQR: interquartile range; SARS-CoV-2: Severe acute respiratory syndrome coronavirus 2. ICU: intensive care unit; ACE: angiotensin-converting enzyme inhibitor; ARB: angiotensin receptor blocker; NSAID: non-steroidal anti-inflammatory drugs.

**Supplementary Table 3.** Predictors of hospitalization and having a fatal course within 30 days among SARS-CoV-2 PCR positive cases, when adjusting single comorbidities for age-, sex-, and additionally for total number of comorbidities.

| Characteristic                                 | <b>Hospitalization</b>                                      | <b>Death within 30 days<sup>2</sup></b>                     |
|------------------------------------------------|-------------------------------------------------------------|-------------------------------------------------------------|
|                                                | Age-, sex., and number of comorbidities adjusted OR (95%CI) | Age-, sex., and number of comorbidities adjusted OR (95%CI) |
| <b>Medical history<sup>1</sup></b>             |                                                             |                                                             |
| Chronic lung diseases*                         | 1.2 (1.0-1.4)                                               | 1.1 (0.9-1.4)                                               |
| Hypertension*                                  | 1.0 (0.9-1.2)                                               | 0.7 (0.5-0.9)                                               |
| Ischemic heart disease*                        | 0.9 (0.7-1.1)                                               | 0.7 (0.6-1.0)                                               |
| Heart failure                                  | 1.4 (1.1-1.9)                                               | 1.1 (0.8-1.5)                                               |
| Loop-diuretics                                 | 1.8 (1.4-2.3)                                               | 1.5 (1.2-2.0)                                               |
| Atrial fibrillation                            | 0.9 (0.7-1.1)                                               | 1.1 (0.9-1.4)                                               |
| Stroke                                         | 0.9 (0.7-1.1)                                               | 1.0 (0.8-1.3)                                               |
| Diabetes*                                      | 1.2 (1.0-1.4)                                               | 1.1 (0.9-1.5)                                               |
| Non-insulin glucose lowering drugs             | 1.2 (0.9-1.4)                                               | 1.0 (0.7-1.3)                                               |
| Insulin                                        | 1.3 (1.0-1.8)                                               | 1.4 (1.0-2.0)                                               |
| Insulin monotherapy                            | 1.4 (0.9-2.2)                                               | 1.1 (0.6-2.0)                                               |
| Dementia*                                      | 0.4 (0.3-0.5)                                               | 1.6 (1.2-2.1)                                               |
| Any Cancer                                     | 1.0 (0.8-1.2)                                               | 1.0 (0.8-1.3)                                               |
| Chronic liver disease                          | 1.5 (1.1-2.2)                                               | 1.1 (0.6-2.1)                                               |
| Hospital-diagnosed kidney disease              | 1.7 (1.3-2.3)                                               | 1.4 (1.0-2.0)                                               |
| Alcohol abuse*                                 | 1.1 (0.8-1.5)                                               | 1.2 (0.8-1.9)                                               |
| Substance abuse*                               | 0.8 (0.6-1.2)                                               | 1.2 (0.7-2.2)                                               |
| Major psychiatric disorder*                    | 1.4 (0.8-2.5)                                               | 1.9 (0.9-3.9)                                               |
| Benzodiazepines and derivates                  | 1.5 (1.2-1.8)                                               | 1.8 (1.4-2.4)                                               |
| Antipsychotics                                 | 1.1 (0.8-1.5)                                               | 3.2 (2.2-4.7)                                               |
| Antidepressants                                | 1.1 (0.9-1.3)                                               | 1.5 (1.2-1.9)                                               |
| Organ transplantation                          | 1.4 (0.7-2.8)                                               | 1.8 (0.7-4.8)                                               |
| Overweight and obesity*                        | 1.3 (1.0-1.6)                                               | 1.0 (0.7-1.4)                                               |
| Rheumatoid arthritis/connective tissue disease | 1.0 (0.8-1.3)                                               | 0.8 (0.6-1.2)                                               |

<sup>1</sup>Medical history is based on an ever-recording of hospital discharge diagnoses. Comorbidities marked by \* are defined by hospital discharge diagnoses in combination with drug redemptions (i.e. filled prescription within 6 months prior to the test date. Of note, there is a lag of 15 days on prescription data). For details on definitions, see **Supplementary Table 1**.

<sup>2</sup>Death was defined as all-cause mortality within 30 days from the index date.

OR: odds ratio; SARS-CoV-2: Severe acute respiratory syndrome coronavirus 2.

**Supplementary Table 4.** Clinical characteristics of SARS-CoV-2 PCR positive cases during subperiods of the epidemic, i.e. containment phase, mitigation phase, and during reopening of the society.

|                            | Containment phase <sup>1</sup><br>27 <sup>th</sup> Feb to 11 <sup>th</sup> Mar | Mitigation phase <sup>2</sup><br>12 <sup>th</sup> Mar to 14 <sup>th</sup> Apr | During re-opening <sup>3</sup><br>15 <sup>th</sup> Apr onwards |
|----------------------------|--------------------------------------------------------------------------------|-------------------------------------------------------------------------------|----------------------------------------------------------------|
| All individuals tested (N) | 2559                                                                           | 71631                                                                         | 144,968                                                        |
| PCR positive cases (N)     | N=756                                                                          | N=6,059                                                                       | N=2,704                                                        |
| Age, median [IQR]          | 43 (32-50)                                                                     | 52 (38-66)                                                                    | 45 (29-61)                                                     |
| ≤18 years                  | 30 (4.0%)                                                                      | 183 (3.0%)                                                                    | 215 (8.0%)                                                     |
| 19-59 years                | 671 (89%)                                                                      | 3,759 (62%)                                                                   | 1,734 (64%)                                                    |
| 60-74 years                | 49 (6.5%)                                                                      | 1,155 (19%)                                                                   | 383 (14%)                                                      |
| ≥75 years                  | 6 (0.8%)                                                                       | 962 (16%)                                                                     | 372 (14%)                                                      |
| Sex                        |                                                                                |                                                                               |                                                                |
| Female                     | 243 (32%)                                                                      | 3,598 (59%)                                                                   | 1,668 (62%)                                                    |
| Male                       | 513 (68%)                                                                      | 2,461 (41%)                                                                   | 1,036 (38%)                                                    |
| Health care workers (N)    | 50 (6.6%)                                                                      | 1,482 (24%)                                                                   | 637 (24%)                                                      |
| Number of comorbidities    | 0 (0-1)                                                                        | 1 (0-2)                                                                       | 0 (0-1)                                                        |
| 0                          | 552 (73%)                                                                      | 2,929 (48%)                                                                   | 1,458 (54%)                                                    |
| 1                          | 160 (21%)                                                                      | 1,403 (23%)                                                                   | 598 (22%)                                                      |
| 2                          | 35 (4.6%)                                                                      | 705 (12%)                                                                     | 279 (10%)                                                      |
| 3                          | 9 (1.2%)*                                                                      | 469 (7.7%)                                                                    | 155 (5.7%)                                                     |
| 4+                         |                                                                                | 553 (9.1%)                                                                    | 214 (7.9%)                                                     |

<sup>1</sup>Test strategy during the containment phase: mainly testing of suspected symptomatic COVID-19 cases with a relevant travel history (mainly from China and Italy)

<sup>2</sup>Test strategy during the mitigation phase: Initially testing of individuals with suspected COVID-19 requiring hospital admission, and testing of symptomatic frontline health care workers in critical functions (e.g. ICU personnel). From late-March onwards, upscaled to include testing of individuals with mild to moderate respiratory symptoms suspicious of COVID-19, as well as broader screening of healthcare professionals

<sup>3</sup>Test strategy during re-opening: Gradually upscaled to include testing of any individuals with mild to severe symptoms suspicious of COVID-19.

\*Number of comorbidities (3 and 4+) collapsed to ensure anonymity.

SARS-CoV-2: Severe acute respiratory syndrome coronavirus 2.

**Supplementary Figure 1.** Hospitalization (A), ICU admission (B) and death in timely relation to the date of having a positive test for SARS-CoV-2 (C).

A) SARS-CoV-2 PCR positive cases who were hospitalized: date of hospital admission relative to sample date

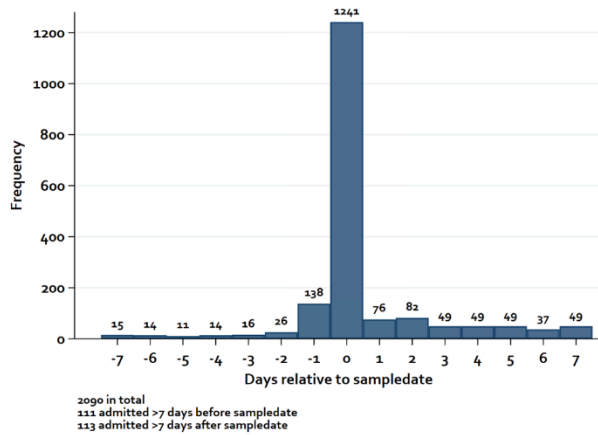

B) SARS-CoV-2 PCR positive cases who were admitted to ICU: date of ICU admission relative to sample date

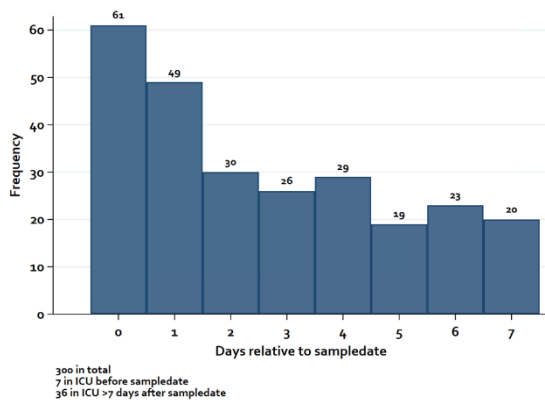

C) SARS-CoV-2 PCR positive cases who died: date of death relative to sample date

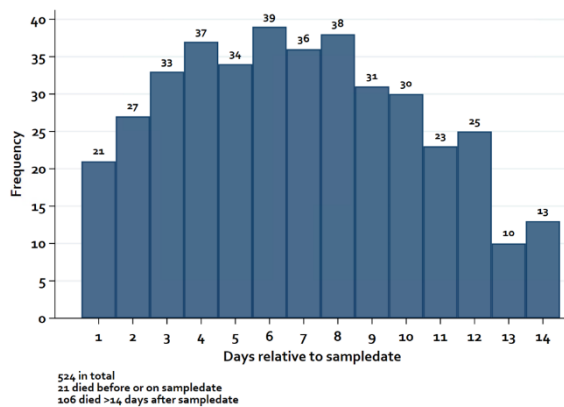



STROBE Statement—checklist of items that should be included in reports of observational studies

|                          | Item No | Recommendation                                                                                                                                                                                                                                                                                                                                                                                                                                                         | Page No                |
|--------------------------|---------|------------------------------------------------------------------------------------------------------------------------------------------------------------------------------------------------------------------------------------------------------------------------------------------------------------------------------------------------------------------------------------------------------------------------------------------------------------------------|------------------------|
| Title and abstract       | 1       | (a) Indicate the study's design with a commonly used term in the title or the abstract                                                                                                                                                                                                                                                                                                                                                                                 | 1                      |
|                          |         | (b) Provide in the abstract an informative and balanced summary of what was done and what was found                                                                                                                                                                                                                                                                                                                                                                    | 2                      |
| <b>Introduction</b>      |         |                                                                                                                                                                                                                                                                                                                                                                                                                                                                        |                        |
| Background/rationale     | 2       | Explain the scientific background and rationale for the investigation being reported                                                                                                                                                                                                                                                                                                                                                                                   | 3                      |
| Objectives               | 3       | State specific objectives, including any prespecified hypotheses                                                                                                                                                                                                                                                                                                                                                                                                       | 3                      |
| <b>Methods</b>           |         |                                                                                                                                                                                                                                                                                                                                                                                                                                                                        |                        |
| Study design             | 4       | Present key elements of study design early in the paper                                                                                                                                                                                                                                                                                                                                                                                                                | 3                      |
| Setting                  | 5       | Describe the setting, locations, and relevant dates, including periods of recruitment, exposure, follow-up, and data collection                                                                                                                                                                                                                                                                                                                                        | 3-5                    |
| Participants             | 6       | (a) <i>Cohort study</i> —Give the eligibility criteria, and the sources and methods of selection of participants. Describe methods of follow-up<br><i>Case-control study</i> —Give the eligibility criteria, and the sources and methods of case ascertainment and control selection. Give the rationale for the choice of cases and controls<br><i>Cross-sectional study</i> —Give the eligibility criteria, and the sources and methods of selection of participants | 4<br>Descriptive study |
|                          |         | (b) <i>Cohort study</i> —For matched studies, give matching criteria and number of exposed and unexposed<br><i>Case-control study</i> —For matched studies, give matching criteria and the number of controls per case                                                                                                                                                                                                                                                 | NA                     |
| Variables                | 7       | Clearly define all outcomes, exposures, predictors, potential confounders, and effect modifiers. Give diagnostic criteria, if applicable                                                                                                                                                                                                                                                                                                                               | 4-5                    |
| Data sources/measurement | 8*      | For each variable of interest, give sources of data and details of methods of assessment (measurement). Describe comparability of assessment methods if there is more than one group                                                                                                                                                                                                                                                                                   | 4-5                    |
| Bias                     | 9       | Describe any efforts to address potential sources of bias                                                                                                                                                                                                                                                                                                                                                                                                              | 5                      |
| Study size               | 10      | Explain how the study size was arrived at                                                                                                                                                                                                                                                                                                                                                                                                                              | 3-5                    |
| Quantitative variables   | 11      | Explain how quantitative variables were handled in the analyses. If applicable, describe which groupings were chosen and why                                                                                                                                                                                                                                                                                                                                           |                        |
| Statistical methods      | 12      | (a) Describe all statistical methods, including those used to control for confounding                                                                                                                                                                                                                                                                                                                                                                                  | 5                      |
|                          |         | (b) Describe any methods used to examine subgroups and interactions                                                                                                                                                                                                                                                                                                                                                                                                    | NA                     |
|                          |         | (c) Explain how missing data were addressed                                                                                                                                                                                                                                                                                                                                                                                                                            | NA                     |
|                          |         | (d) <i>Cohort study</i> —If applicable, explain how loss to follow-up was addressed<br><i>Case-control study</i> —If applicable, explain how matching of cases and controls was addressed                                                                                                                                                                                                                                                                              | NA                     |

*Cross-sectional study*—If applicable, describe analytical methods taking account of sampling strategy

(e) Describe any sensitivity analyses

4-5

Continued on next page

| <b>Results</b>           |     |                                                                                                                                                                                                              |      |
|--------------------------|-----|--------------------------------------------------------------------------------------------------------------------------------------------------------------------------------------------------------------|------|
| Participants             | 13* | (a) Report numbers of individuals at each stage of study—eg numbers potentially eligible, examined for eligibility, confirmed eligible, included in the study, completing follow-up, and analysed            | 4    |
|                          |     | (b) Give reasons for non-participation at each stage                                                                                                                                                         |      |
|                          |     | (c) Consider use of a flow diagram                                                                                                                                                                           |      |
| Descriptive data         | 14* | (a) Give characteristics of study participants (eg demographic, clinical, social) and information on exposures and potential confounders                                                                     | 5-7  |
|                          |     | (b) Indicate number of participants with missing data for each variable of interest                                                                                                                          |      |
|                          |     | (c) <i>Cohort study</i> —Summarise follow-up time (eg, average and total amount)                                                                                                                             |      |
| Outcome data             | 15* | <i>Cohort study</i> —Report numbers of outcome events or summary measures over time                                                                                                                          |      |
|                          |     | <i>Case-control study</i> —Report numbers in each exposure category, or summary measures of exposure                                                                                                         |      |
|                          |     | <i>Cross-sectional study</i> —Report numbers of outcome events or summary measures                                                                                                                           |      |
| Main results             | 16  | (a) Give unadjusted estimates and, if applicable, confounder-adjusted estimates and their precision (eg, 95% confidence interval). Make clear which confounders were adjusted for and why they were included | 5-7  |
|                          |     | (b) Report category boundaries when continuous variables were categorized                                                                                                                                    |      |
|                          |     | (c) If relevant, consider translating estimates of relative risk into absolute risk for a meaningful time period                                                                                             |      |
| Other analyses           | 17  | Report other analyses done—eg analyses of subgroups and interactions, and sensitivity analyses                                                                                                               |      |
| <b>Discussion</b>        |     |                                                                                                                                                                                                              |      |
| Key results              | 18  | Summarise key results with reference to study objectives                                                                                                                                                     | 8    |
| Limitations              | 19  | Discuss limitations of the study, taking into account sources of potential bias or imprecision. Discuss both direction and magnitude of any potential bias                                                   | 9-10 |
| Interpretation           | 20  | Give a cautious overall interpretation of results considering objectives, limitations, multiplicity of analyses, results from similar studies, and other relevant evidence                                   | 10   |
| Generalisability         | 21  | Discuss the generalisability (external validity) of the study results                                                                                                                                        | 9-10 |
| <b>Other information</b> |     |                                                                                                                                                                                                              |      |
| Funding                  | 22  | Give the source of funding and the role of the funders for the present study and, if applicable, for the original study on which the present article is based                                                | 14   |

\*Give information separately for cases and controls in case-control studies and, if applicable, for exposed and unexposed groups in cohort and cross-sectional studies.
